# Supplementary material for: L-Aminoguanidine Induces Imbalance of ROS/RNS Homeostasis and Polyamine Catabolism of Tomato Roots after Short-Term Salt Exposure
Source: MDPI journal article supplement (doi:10.3390/antiox12081614), 2023-08-15
Supplement: s1 [file s1]

## Additional files:

**Table S1.** Primer list of used primers in this study.

| Sequence (5'-3')         | Primer            | Target Gene                                    | NCBI Accession     | References |
|--------------------------|-------------------|------------------------------------------------|--------------------|------------|
| TATGCTCACGAGCGAAGAGG     | SIPAO1-F          | <i>SIPAO1</i>                                  | XP_004229651       | [1]        |
| GCATTTTCCATGTGCTGCCA     | SIPAO1-R          | <i>SIPAO1</i>                                  | XP_004229651       | [1]        |
| TGCTGCAGATGCTGATTCCA     | SIPAO2-F          | <i>SIPAO2</i>                                  | XP_004243630       | [1]        |
| AGGACGATATCCCCGAACCA     | SIPAO2-R          | <i>SIPAO2</i>                                  | XP_004243630       | [1]        |
| CGGCGTTTTTGTTCACGGAT     | SIPAO4-F          | <i>SIPAO4</i>                                  | XP_004232664       | [1]        |
| CCTACCTAAGCGGGGTGGTA     | SIPAO4-R          | <i>SIPAO4</i>                                  | XP_004232664       | [1]        |
| CCTGATGCACCTGAACCTGT     | SIPAO5-F          | <i>SIPAO5</i>                                  | XP_004234492       | [1]        |
| GGAATCCGGATCTGTTCCCC     | SIPAO5-R          | <i>SIPAO5</i>                                  | XP_004234492       | [1]        |
| GCTTATGTTATGACCGCAATCAGT | SIADC1-F          | <i>SIADC1</i>                                  | Solyc01g110440.4   | [2]        |
| TACCCCGTAAGGAGGCGAT      | SIADC1-R          | <i>SIADC1</i>                                  | Solyc01g110440.4   | [2]        |
| TCGGCGGACTCCATAACCTA     | SIADC2-F          | <i>SIADC2</i>                                  | Solyc10g054440.2   | [2]        |
| TTACAGCGAAGCTGTGAGGG     | SIADC2-R          | <i>SIADC2</i>                                  | Solyc10g054440.2   | [2]        |
| TCCACGACTTCCCTGAGCTA     | SIODC1-F          | <i>SIODC1</i>                                  | Solyc04g082030.1   | [2]        |
| AAAGTGAACGCTGTTTCGGC     | SIODC1-R          | <i>SIODC1</i>                                  | Solyc04g082030.1   | [2]        |
| TACGGACCAAGTTGTGACTCC    | SIODC3-F          | <i>SIODC3</i>                                  | Solyc03g098310.1   | [2]        |
| CTCAGGGAATTGTATGTCAATGGC | SIODC3-R          | <i>SIODC3</i>                                  | Solyc03g098310.1   | [2]        |
| GGGCTGCTGGCTTGTTTG       | SICuAO-F          | <i>SICuAO</i>                                  | Solyc08g079430.2.1 | [3]        |
| TGATGATACTGTTGGCATTATTGG | SICuAO-R          | <i>SICuAO</i>                                  | Solyc08g079430.2.1 | [3]        |
| GGAAGTTGAGAAGGAGCCTAAG   | SIEF1 $\alpha$ -F | <i>elongation factor 1-<math>\alpha</math></i> | NM_001247106       | [4]        |
| CAACACCAACAGCAACAGTCT    | SIEF1 $\alpha$ -R | <i>elongation factor 1-<math>\alpha</math></i> | NM_001247106       | [4]        |
| CCAAGATCCAGGACAAGGAA     | SIUBI3-F          | <i>ubiquitin 3</i>                             | NM_001346406       | [5]        |
| AAATCAAACGCTGCTGGTCT     | SIUBI3-R          | <i>ubiquitin 3</i>                             | NM_001346406       | [5]        |

## References

- Hao, Y.; Huang, B.; Jia, D.; Mann, T.; Jiang, X.; Qiu, Y.; Niitsu, M.; Berberich, T.; Kusano, K.; Liu, T. Identification of seven polyamine oxidase genes in tomato (*Solanum lycopersicum* L.) and their expression profiles under physiological and various stress conditions. *J. Plant Physiol.* **2018**, *228*, 1–11.
- Liu, T.; Huang, B.; Chen, L.; Xian, Z.; Song, S.; Chen, R.; Hao, Y. Genome-wide identification, phylogenetic analysis, and expression profiling of polyamine synthesis gene family members in tomato. *Gene* **2018**, *661*, 1–10. <https://doi.org/10.1016/j.gene.2018.03.084>.
- Upadhyay, R.K.; Fatima, T.; Handa, A.K.; Mattoo, A.K. Polyamines and Their Biosynthesis/Catabolism Genes Are Differentially Modulated in Response to Heat Versus Cold Stress in Tomato Leaves (*Solanum lycopersicum* L.). *Cells* **2020**, *9*, 1749. <https://doi.org/10.3390/cells9081749>.
- Ma, N.; Feng, H.; Meng, X.; Li, D.; Yang, D.; Wu, C.; Meng, Q. Overexpression of tomato SINAC1 transcription factor alters fruit pigmentation and softening. *BMC Plant Biol.* **2014**, *14*, 1–14. <https://doi.org/10.1186/s12870-014-0351-y>.
- Poyatos-Pertíñez, S.; Quinet, M.; Ortiz-Atienza, A.; Yuste-Lisbona, F.J.; Pons, C.; Giménez, E.; Angosto, T.; Granell, A.; Capel, J.; Lozano, R. A Factor Linking Floral Organ Identity and Growth Revealed by Characterization of the Tomato Mutant unfinished flower development (ufd). *Front. Plant Sci.* **2016**, *7*, 1648. <https://doi.org/10.3389/fpls.2016.01648>.

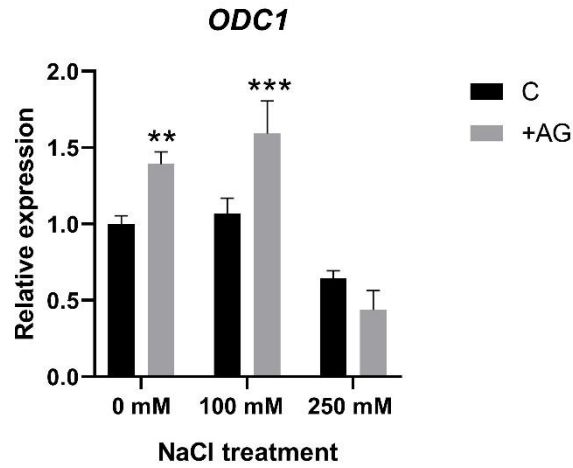

**Figure S1.** Expressions of *ODC1* gene of control and AG-treated tomato roots with and without NaCl treatment (100 and 250 mM). Relative expression levels were normalized to *SIEF1* and *SIUBI3* reference genes. Data of each bar are the mean  $\pm$  SD of at least three biological replicates,  $n = 3$ . Asterisks denote significant differences from untreated control, Student *t* test, \*\*  $p < 0.01$ , \*\*\*  $p < 0.001$ .

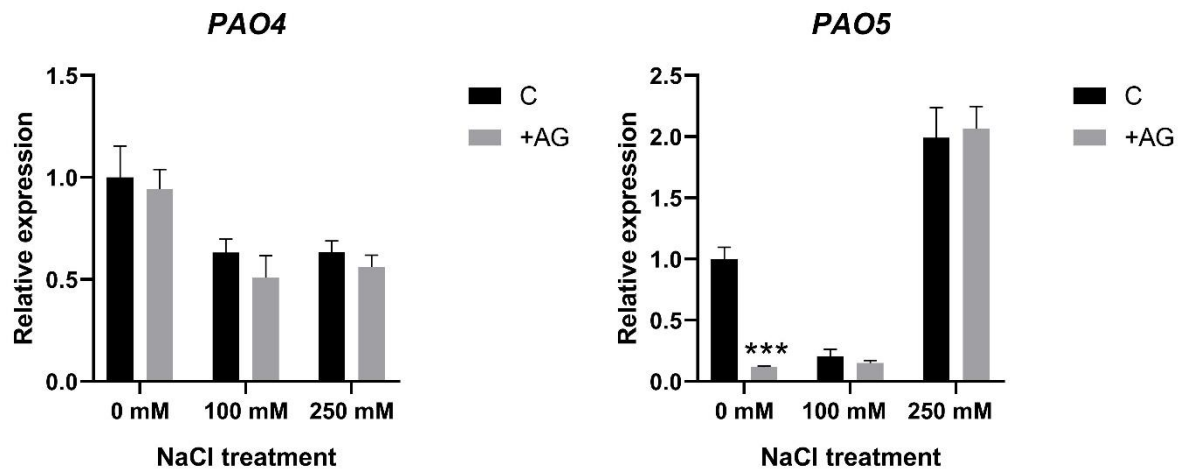

**Figure S2.** Expressions of *PAO4* and *PAO5* genes of control and AG-treated tomato roots with and without NaCl treatment (100 and 250 mM). Relative expression levels were normalized to *SIEF1* and *SIUBI3* reference genes. Data of each bar are the mean  $\pm$  SD of at least three biological replicates,  $n = 3$ . Asterisks denote significant differences from untreated control, Student *t* test, \*\*\*  $p < 0.001$ .

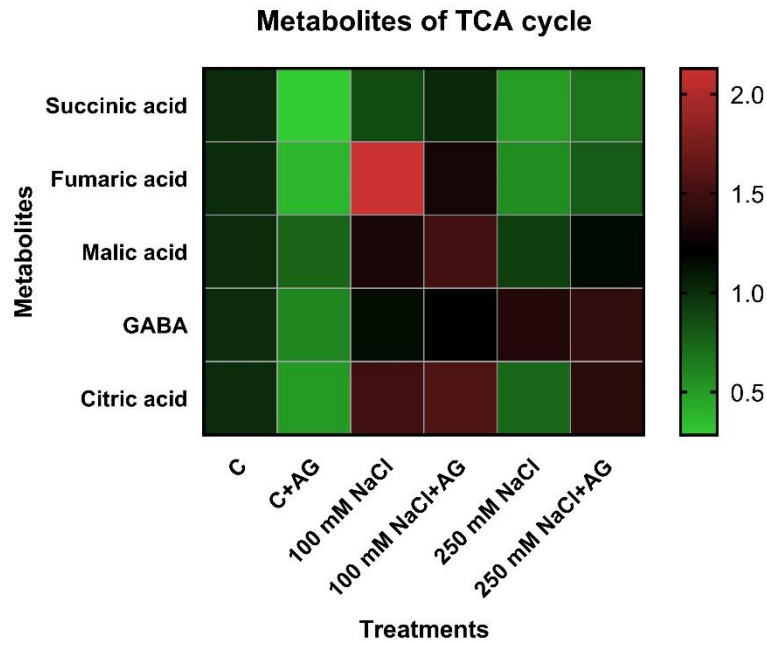

**Figure S3.** Heat map of some important TCA cycle metabolite contents of control and AG-treated tomato roots with and without NaCl treatment (100 and 250 mM). All data were normalized for control untreated root samples.

**Table S2.** Levels of some important TCA cycle metabolite contents of control and AG-treated tomato roots with and without NaCl treatment (100 and 250 mM). Different letters denote significant differences (two-way ANOVA, Tukey's post hoc test  $p = 0.05$ ).

| Treatments     | Succinic acid | Fumaric acid | Malic acid     | GABA           | Citric acid  |
|----------------|---------------|--------------|----------------|----------------|--------------|
| Control        | 29.39±17.19a  | 6.48±3.44ab  | 284.18±138.98a | 195.36±57.99ab | 59.53±28.96a |
| C+AG           | 8.32±6.00b    | 2.43±0.89b   | 212.17±52.43a  | 115.87±34.87b  | 30.34±21.82a |
| 100 mM NaCl    | 25.37±6.01ab  | 13.79±8.67a  | 373.48±156.94a | 222.75±81.65ab | 88.73±72.84a |
| 100 mM NaCl+AG | 29.75±10.75a  | 8.47±8.04ab  | 427.22±207.13a | 233.67±70.40a  | 92.77±42.49a |
| 250 mM NaCl    | 14.46±9.87ab  | 3.67±2.80b   | 260.85±145.81a | 265.43±72.15a  | 43.89±9.74a  |
| 250 mM NaCl+AG | 20.50±6.63ab  | 5.14±2.64ab  | 326.69±117.86a | 278.01±33.70a  | 83.5±25.39a  |

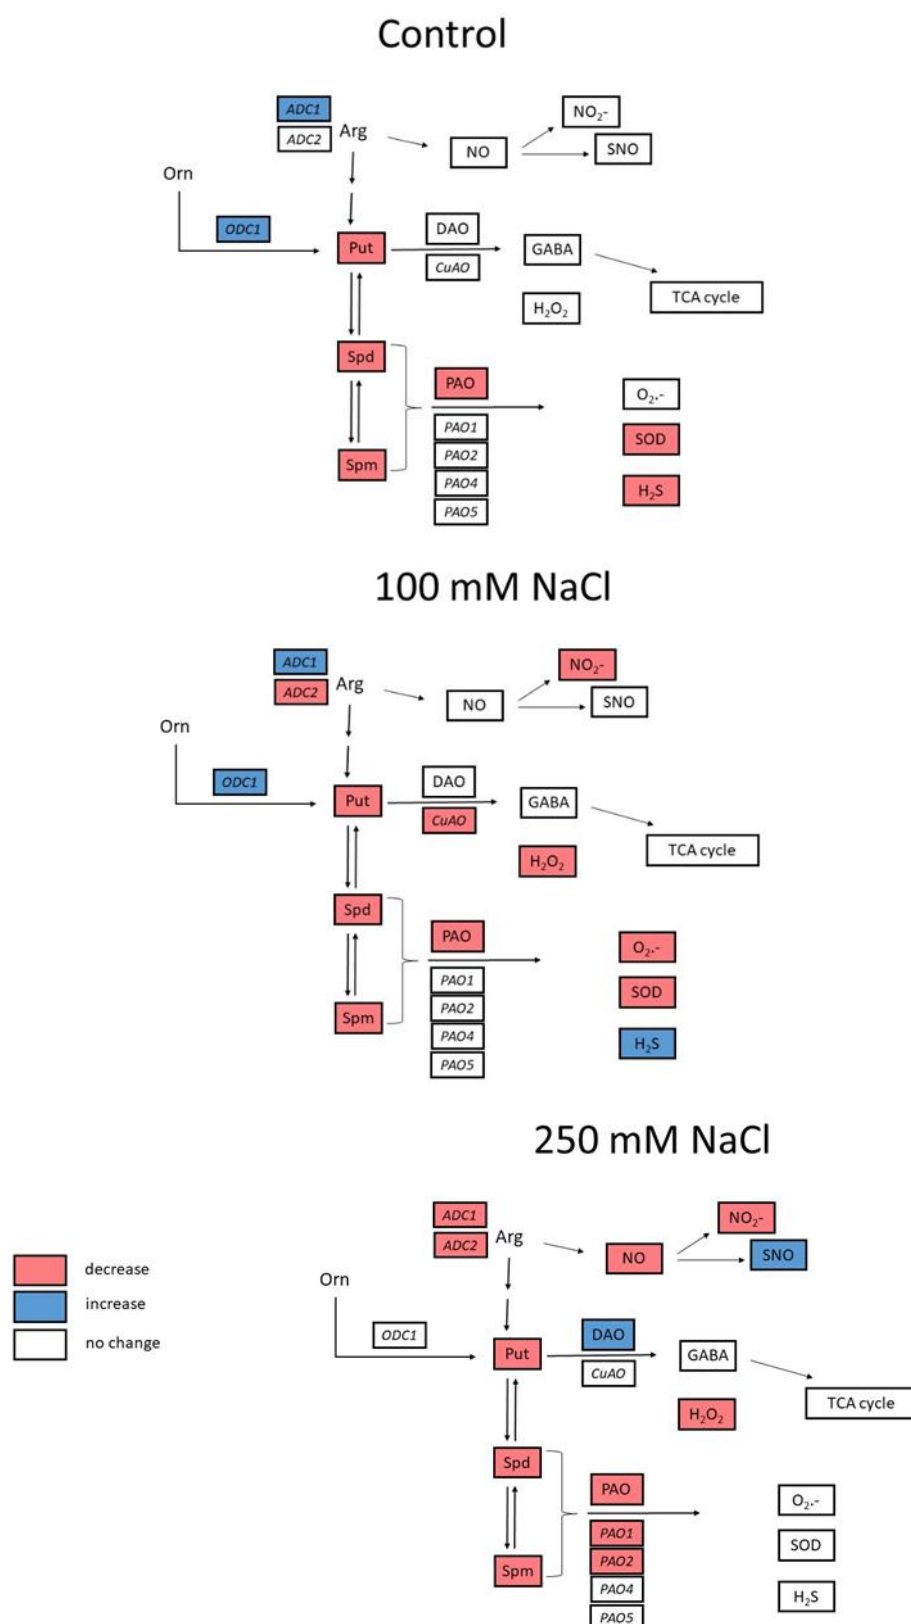

**Figure S4.** Representative summary of AG treatment and salt stress on tomato roots exposed to NaCl at 100 and 250 mM concentration. Abbreviations in this diagram: *ADC1*—arginine decarboxylase 1; *ADC2*—arginine decarboxylase 2; Arg—L-arginine; *ODC1*—ornithine decarboxylase 1; Orn—L-ornithine; NO—nitric oxide; NO<sub>2</sub><sup>•</sup>—nitrite; SNO—S-nitrosothiols; Put—putrescine; DAO—diamine oxidase or copper amine oxidase; CuAO—copper amine oxidase; GABA—gamma amino butyric acid; H<sub>2</sub>O<sub>2</sub>—hydrogen peroxide, TCA cycle- tricarboxylic acid cycle; Spd—spermidine; Spm—spermine; PAO—polyamine oxidase; *PAO1*—polyamine oxidase 1; *PAO2*—polyamine oxidase 2; *PAO4*—polyamine oxidase 4; *PAO5*—polyamine oxidase 5; O<sub>2</sub><sup>•-</sup>—superoxide anion; SOD—superoxide dismutase; H<sub>2</sub>S—hydrogen sulfide.

Table S3. P values for AG and NaCl treatments in case of different parameters

| Parameter                                  | AG Treatment<br>p Value | NaCl Treatment<br>p Value | Interaction<br>p Value | Summary                                                                                                                                                                                                                                                                                  |
|--------------------------------------------|-------------------------|---------------------------|------------------------|------------------------------------------------------------------------------------------------------------------------------------------------------------------------------------------------------------------------------------------------------------------------------------------|
| DAO<br>Figure 1.                           | 1.65E-04                | 5.24E-04                  | 3.48E-04               | At the 0.05 level, the population means of AG treatment are significantly different.<br>At the 0.05 level, the population means of NaCl treatment are significantly different.<br>At the 0.05 level, the interaction between AG treatment and NaCl treatment is significant.             |
| PAO<br>Figure 1.                           | 1.70E-05                | 0.028                     | 0.121                  | At the 0.05 level, the population means of AG treatment are significantly different.<br>At the 0.05 level, the population means of NaCl treatment are significantly different.<br>At the 0.05 level, the interaction between AG treatment and NaCl treatment is not significant.         |
| Put<br>Figure 2.                           | 4.89E-07                | 0.060                     | 0.069                  | At the 0.05 level, the population means of AG treatment are significantly different.<br>At the 0.05 level, the population means of NaCl treatment are not significantly different.<br>At the 0.05 level, the interaction between AG treatment and NaCl treatment is not significant.     |
| Spd<br>Figure 2.                           | 0.007                   | 0.702                     | 0.099                  | At the 0.05 level, the population means of AG treatment are significantly different.<br>At the 0.05 level, the population means of NaCl treatment are not significantly different.<br>At the 0.05 level, the interaction between AG treatment and NaCl treatment is not significant.     |
| Spm<br>Figure 2.                           | 0.848                   | 0.159                     | 0.273                  | At the 0.05 level, the population means of AG treatment are not significantly different.<br>At the 0.05 level, the population means of NaCl treatment are not significantly different.<br>At the 0.05 level, the interaction between AG treatment and NaCl treatment is not significant. |
| Total PAs<br>Figure 2.                     | 3.44E-07                | 0.140                     | 0.076                  | At the 0.05 level, the population means of AG treatment are significantly different.<br>At the 0.05 level, the population means of NaCl treatment are not significantly different.<br>At the 0.05 level, the interaction between AG treatment and NaCl treatment is not significant.     |
| H <sub>2</sub> O <sub>2</sub><br>Figure 6. | 9.06E-08                | 7.03E-09                  | 0.023                  | At the 0.05 level, the population means of AG treatment are significantly different.<br>At the 0.05 level, the population means of NaCl treatment are significantly different.<br>At the 0.05 level, the interaction between AG treatment and NaCl treatment is significant.             |
| SOD<br>Figure 6.                           | 1.22E-06                | 7.10E-05                  | 2.06E-06               | At the 0.05 level, the population means of AG treatment are significantly different.<br>At the 0.05 level, the population means of NaCl treatment are significantly different.<br>At the 0.05 level, the interaction between AG treatment and NaCl treatment is significant.             |

|                            |          |          |          |                                                                                                                                                                                                                                                                                  |
|----------------------------|----------|----------|----------|----------------------------------------------------------------------------------------------------------------------------------------------------------------------------------------------------------------------------------------------------------------------------------|
| DHE<br>Figure 7.           | 0.021    | 9.77E-06 | 9.72E-04 | At the 0.05 level, the population means of AG treatment are significantly different.<br>At the 0.05 level, the population means of NaCl treatment are significantly different.<br>At the 0.05 level, the interaction between AG treatment and NaCl treatment is significant.     |
| NO<br>Figure 8.            | 1.03E-04 | 5.89E-04 | 0.129    | At the 0.05 level, the population means of AG treatment are significantly different.<br>At the 0.05 level, the population means of NaCl treatment are significantly different.<br>At the 0.05 level, the interaction between AG treatment and NaCl treatment is not significant. |
| Nitrite<br>Figure 9.       | 1.08E-04 | 2.48E-07 | 0.009    | At the 0.05 level, the population means of AG treatment are significantly different.<br>At the 0.05 level, the population means of NaCl treatment are significantly different.<br>At the 0.05 level, the interaction between AG treatment and NaCl treatment is significant.     |
| Nitrosothiols<br>Figure 9. | 0.007    | 4.63E-07 | 2.65E-05 | At the 0.05 level, the population means of AG treatment are significantly different.<br>At the 0.05 level, the population means of NaCl treatment are significantly different.<br>At the 0.05 level, the interaction between AG treatment and NaCl treatment is significant.     |
| WSP-1<br>Figure 10.        | 0.807    | 0        | 1.09E-06 | At the 0.05 level, the population means of AG treatment are not significantly different.<br>At the 0.05 level, the population means of NaCl treatment are significantly different.<br>At the 0.05 level, the interaction between AG treatment and NaCl treatment is significant. |
